# Supplementary material for: Design of a gold nanoprobe for the detection ofPseudomonas aeruginosaelastase gene (lasB)
Source: Royal Society of Chemistry journal article supplement (doi:10.1039/d0ra00848f), 2020-01-01
Supplement: d0ra00848f1.pdf [file d0ra00848f1.pdf]

supplementary information

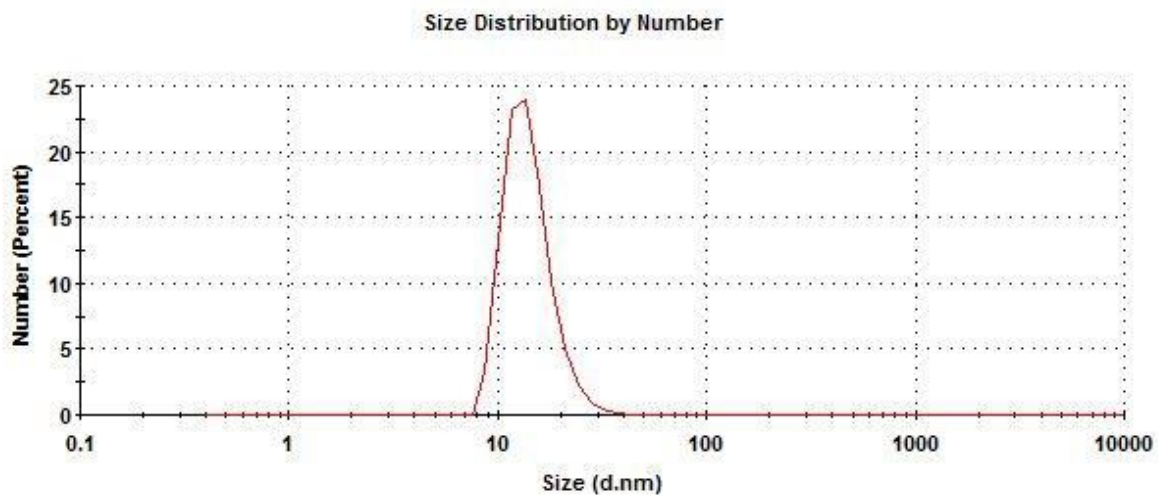

Fig1. Gold nanoparticle size distribution by number using DLS.

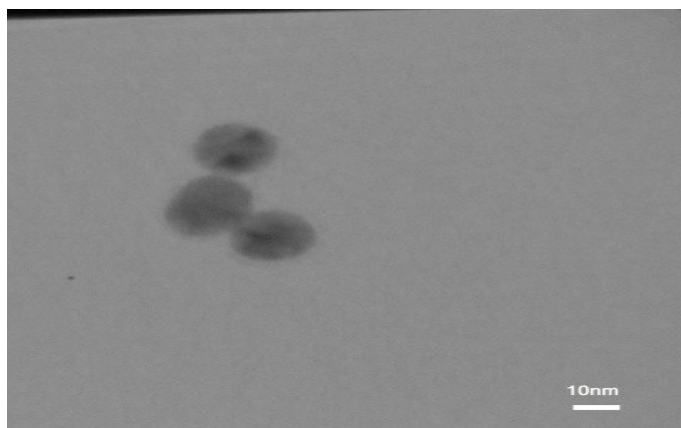

Fig2. TEM microscope image of gold nanoparticles (scale bar is 10 nm)

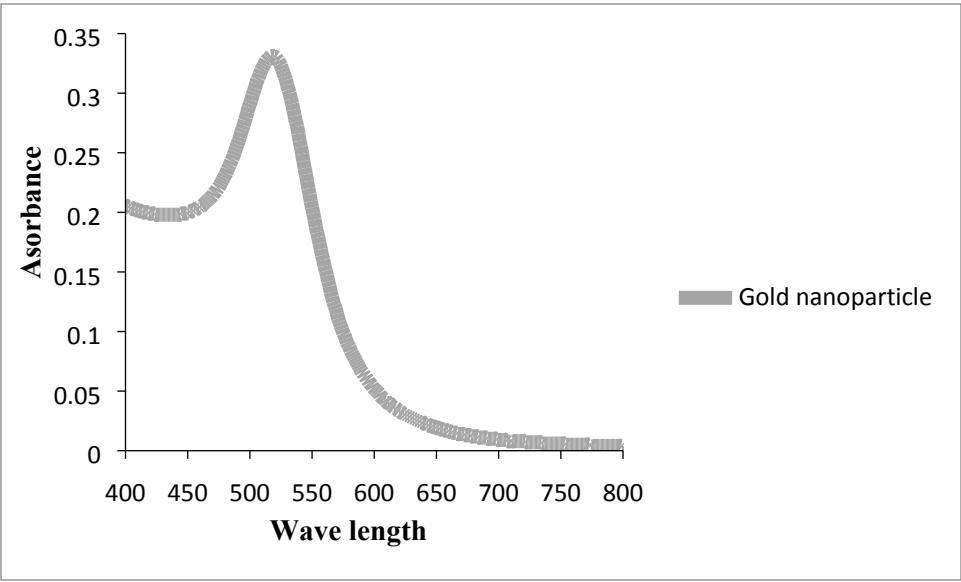

Fig 3. Absorption spectrum of gold nanoparticles

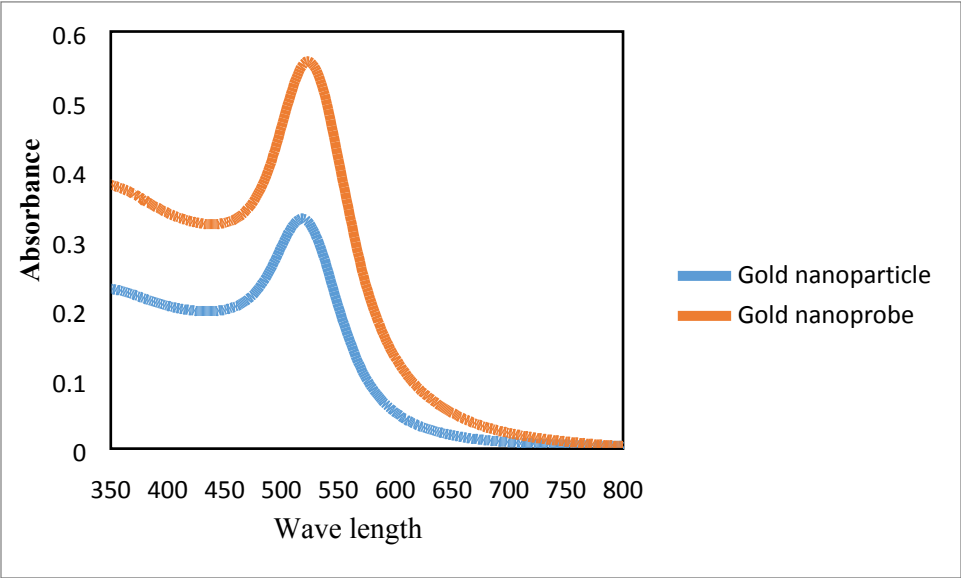

Fig4. UV-Vis spectrophotometer nanoprobe vs. nanoparticle absorption peak

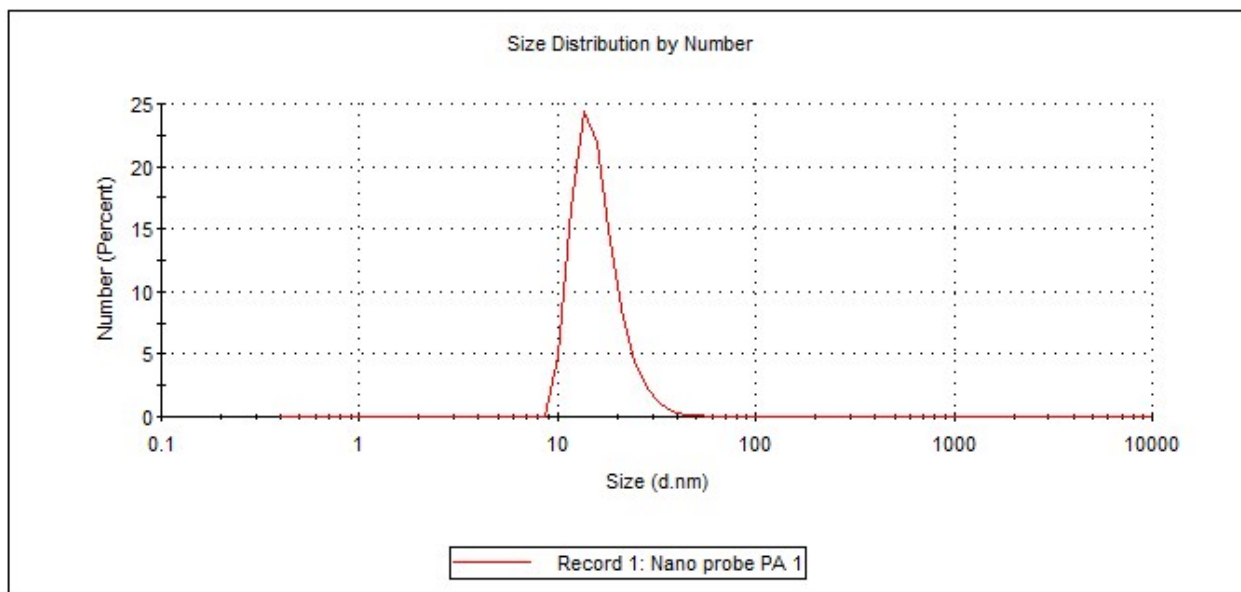

Fig5. Nano-probe size distribution by number using DLS.

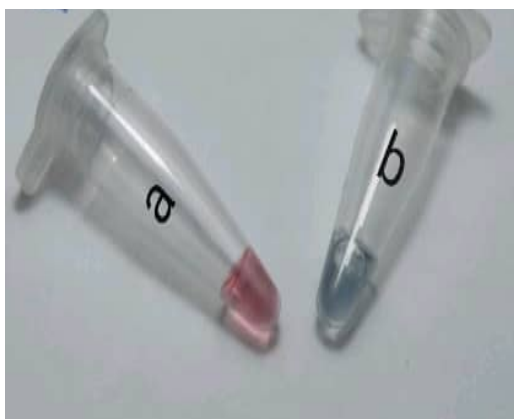

Fig6. Investigation of binding of thiol probe to gold nanoparticle surface using DTT. a) Nanoprobe (control) b) Nanoprobe solution (10 nM) after adding DTT at 16 mM concentration

**Table 1** primers and probe sequences in this study

---

|            |                                                            |
|------------|------------------------------------------------------------|
| lasB       |                                                            |
| Probe      | 5'-HS-(CH <sub>2</sub> )- AAAAAAAAAAAGAGAACAACATCGCCCAA-3' |
| Primers    |                                                            |
| Forward    | 5'- ACGAACTGAAAGCGATCCG-3'                                 |
| Reverse    | 5'- TTCCCACTGATCGACCACTT-3'                                |
| U.u urease |                                                            |
| Primers    |                                                            |
| Forward    | 5'- TGCTGGTGGTACAGGTATGAA-3'                               |
| Reverse    | 5'- GGAGCATGTCCACCACCA-3'                                  |

---

**Table 2** amplification program of the non-target urease gene

---

| Stage                |              | Temperature, c | Time,min |
|----------------------|--------------|----------------|----------|
| Primary Denaturation |              | 95             | 3        |
| Cycle number(35)     | denaturation | 95             | 0.5      |
|                      | annealing    | 58             | 0.5      |
|                      | extension    | 72             | 0.5      |
| final extension      |              | 72             | 5        |

---
